# Supplementary material
Source: publisher figshare collection journal article supplement (https://gsajournals.figshare.com/articles/dataset/_/14140745)
Supplement: Supplementary file 1 [file 1]

## Sheet: Sheet1
Data type	Experimental species	Symbol/name used in publication	Source – public	Source – published	Source – unpublished	Identifiers	New reagent	Comments
Data type (mandatory) Duplicate rows as needed. Order is flexible, but row titles must be preserved.	Experimental species (mandatory, "NA" okay)	Symbol/name used in publication (mandatory)	Source – public [stock center; company, data repository] (one of D,E,F mandatory)	Source -- published [PMID or 'this paper'] (one of D,E,F mandatory)	Source – unpublished [description, incl. lab of origin] (one of D,E,F mandatory)	Identifiers [format as ID_source:identifier] Separate multiple entries with semi-colon, space	New reagent (mandatory for new entities) Description, progenitor(s)	Comments (optional) Genotypes, purpose of reagent, additional information
gene (source not applicable)	D. melanogaster	lint	NA	NA	NA	FB:FBgn0286782; NCBI:35902	NA	CG8213
genetic reagent (in whole organism)	D. melanogaster	w[1118]			Stephen Cohen lab	FB:FBal0018186; RRID:BDSC_3605		w[1118]
genetic reagent (in whole organism)	D. melanogaster	RNAi-CG8213-GD/TM3	Vienna Drosophila Resource Center			VDRC:7372; FB:FBst0470670		w[1118]; P{GD1886}v7372/TM3
genetic reagent (in whole organism)	D. melanogaster	RNAi-CG8213-GD/TM3SbSerTwiGFP		this paper			Generated from RNAi-CG8213-GD/TM3	w[1118]; P{GD1886}v7372/TM3SbSerTwiGFP
genetic reagent (in whole organism)	D. melanogaster	RNAi-CG8213-KK	Vienna Drosophila Resource Center			VDRC:107288; FB:FBst0479110		P{KK105169}VIE-260B
genetic reagent (in whole organism)	D. melanogaster	breathless-Gal80			Stefan Luschnig lab			(y)w(*)(hs-Flp122);Sco/CyO,sp,P(w+BtlGal80); BtlGal4-UAS-GFP
genetic reagent (in whole organism)	D. melanogaster	breathless-Gal80;lintRi		this paper			Generated from breathless-Gal80 and RNAi-CG8213-GD/TM3	Sco/CyOBtlGal80;P{GD1886}v7372/TM3Ser
genetic reagent (in whole organism)	D. melanogaster	Ubi-EGFP-ODDD			Stefan Luschnig lab			w[1118];Sp/CyO;Dfd-YFP;Ubi-EGFP-ODDD(9-1-1)/(TM6B Tb Hu)
genetic reagent (in whole organism)	D. melanogaster	dilp2-Gal4;ODDD-EGFP		this paper			Generated from Ubi-EGFP-ODDD and dilp2-Gal4	dilp2-Gal4/CyO;ubi-EGFP-ODDD/TM6
genetic reagent (in whole organism)	D. melanogaster	Ubi-mRFP-NLS-FRT40A			Stefan Luschnig lab			yw;Ubi-mRFP-NLS-FRT40A/CyO
genetic reagent (in whole organism)	D. melanogaster	nls-RFP		this paper			Generated from Ubi-mRFP-NLS-FRT40A and RNAi-CG8213-GD/TM3	Ubi-mRFP-NLS-FRT40A/CyO;lintRi/TM6
genetic reagent (in whole organism)	D. melanogaster	dilp2-Gal4			Stephen Cohen lab	RRID:BDSC_37516; FB:FBst0037516		dilp2-Gal4/CyO
genetic reagent (in whole organism)	D. melanogaster	dilp3-Gal4/CyO			Stephen Cohen lab	RRID:BDSC_52660; FB:FBst0052660		dilp3-Gal4/CyO
genetic reagent (in whole organism)	D. melanogaster	dilp3-Gal4/CyOGFP		this paper			Generated from dilp3-Gal4/CyO	dilp3-Gal4/CyOGFP
genetic reagent (in whole organism)	D. melanogaster	breathless-Gal4			Stephen Cohen lab			BtlGal4-UAS-GFP/CyO
genetic reagent (in whole organism)	D. melanogaster	UAS-dilp2			Stephen Cohen lab			UAS-dilp2/UAS-dilp2
genetic reagent (in whole organism)	D. melanogaster	UAS-dilp2;lintRi		this paper			Generated from UAS-dilp2 and RNAi-CG8213-GD/TM3	UAS-dilp2/CyO; lintRi/MKRS
genetic reagent (in whole organism)	D. melanogaster	UAS-slif-anti		PMID: 33023929	Pierre Leopold lab			UAS-Slif-anti/UAS-Slif-anti
antibody	D. melanogaster	Rabbit anti-dilp2		PMID: 31770521				Rabbit DILP2 polyclonal antibody against a DILP2 peptide sequence TRQRQGIVERC (amino acids 108-118)
antibody	D. melanogaster	Rabbit anti-GFP	Invitrogen			Cat. #: A-6455
antibody	D. melanogaster	Alexa Fluor® 488 Goat Anti-Rabbit IgG	ThermoFisher Scientific			Cat. #: A27034
antibody	D. melanogaster	Alexa Fluor® 633 Goat Anti-Mouse IgG	ThermoFisher Scientific			Cat. #: A-21050
antibody	D. melanogaster	Anti-rabbit with IgG horseradish peroxidase-conjugated	Cell Signaling Technology			Cat. #: 7074
antibody	D. melanogaster	anti-Akt	Cell Signaling Technology			Cat #: 9272
antibody	D. melanogaster	anti-pAkt	Cell Signaling Technology			Cat #: 4054
antibody	D. melanogaster	anti-pS6K	Cell Signaling Technology			Cat #: 9209
antibody	D. melanogaster	anti-actin	BD Biosciences			Cat #: 612656
sequence-based reagent	D. melanogaster	4ebp	Sigma	PMID: 31770521				FP: 5’-CACTCCTGGAGGCACCA-3’ RP: 5’-GAGTTCCCCTCAGCAAGCAA-3’
sequence-based reagent	D. melanogaster	dilp6	Sigma	PMID: 31770521				FP: 5’-CGATGTATTTCCCAACAGTTTCG-3’ RP: 5’AAATCGGTTACGTTCTGCAAGTC-3’
sequence-based reagent	D. melanogaster	inr	Sigma	PMID: 31770521				FP: 5’-CACCCCGCTTCTATACTCCA-3’ RP: 5’-GTTAGGATGGTGGCCTGTTC-3’
sequence-based reagent	D. melanogaster	lint	Sigma	this paper				FP: 5’-TCATGATTGCCTCCATTTCA-3’ RP: 5’-CAGACACTCCACTTGCTCCA-3’
sequence-based reagent	D. melanogaster	scylla	Sigma	this paper				FP: 5’-AGTCGCGTCATTTGACCTGT-3’ RP: 5’-CTCCGGACTGATGGTGATCG-3’
sequence-based reagent	D. melanogaster	ldh	Sigma	this paper				FP: 5’-ATACACCTCCTGGGCCATTG-3’ RP: 5’-CAATGCCATGTTCGCCCAAA-3’
sequence-based reagent	D. melanogaster	rp49	Sigma	PMID: 31770521				FP: 5’-GCTAAGCTGTCGCACAAA-3’ RP: 5’-TCCGGTGGGCAGCATGTG-3’
commercial assay	D. melanogaster	Serum triglyceride determination kit	Sigma			Cat. #: TR0100
commercial assay	D. melanogaster	Quick Start™ Bradford 1X Dye Reagent	BioRad			Cat. #: 500-0205
commercial assay	D. melanogaster	QIAGEN RNeasy Plus Mini Kit	QIAGEN			Cat. #: 74134
commercial assay	D. melanogaster	Qubit™ RNA HS Assay Kit	Invitrogen			Cat. #: Q32852
commercial assay	D. melanogaster	SuperScript® III First-Strand Synthesis System	ThermoFisher Scientific			Cat. #: 18080051
commercial assay	D. melanogaster	Power SYBR® Green PCR Master Mix	ThermoFisher Scientific			Cat. #: 4368702
commercial assay	D. melanogaster	Glycogen assay kit	Sigma			MAK016
other	NA	Yellow Cornmeal	Genesee			Cat. #: 62-101
other	NA	Inactive Dry Yeast	Genesee			Cat. #: 62-108
other	NA	Dextrose	Genesee			Cat. #: 62-113
other	NA	Agar	Genesee			Cat. #: 66-103
other	NA	Nipagin	Genesee			Cat. #: 20-258
other	NA	Tween-20	Sigma			Cat. #: P9416
other	NA	Phosphate Buffered Saline	Sigma			Cat. #: P4417
other	NA	Paraformaldehyde	Sigma			Cat. #: P6148
other	NA	Triton-X	Bio-Rad			Cat. #: 161-0407
other	NA	Bovine Serum Albumin	Sigma			Cat. #: A2153
other	NA	RIPA buffer with cOmplete™, EDTA-free Protease Inhibitor Cocktail	Sigma			Cat. #: 4693132001
other	NA	Laemmli sample buffer	Biorad			Cat. #: 1610737
other	NA	Immobilon Western Chemiluminescent HRP Substrate	Merck, Millipore			Cat. #: WBKLS0050
other	NA	PVDF membrane	Biorad			Cat. #: 162-0177
